# Supplementary material for: Calibration and generalizability of probabilistic models on low-data chemical datasets with DIONYSUS
Source: Royal Society of Chemistry journal article supplement (doi:10.1039/d2dd00146b), 2023-01-01

Electronic Supplementary Material (ESI) for Digital Discovery.  
This journal is © The Royal Society of Chemistry 2023

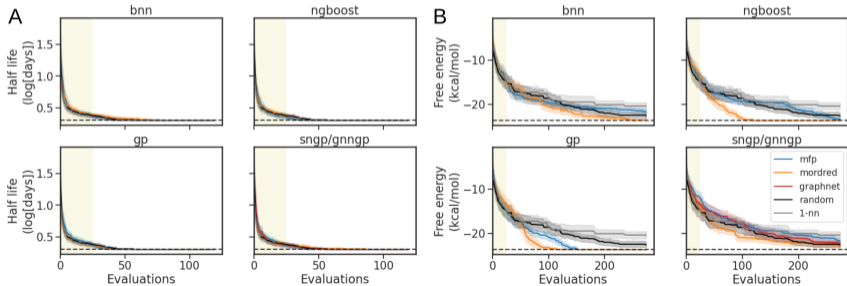

Supplement: d2dd00146b3.pdf [file d2dd00146b3.pdf]
