# Supplementary figures and images for: Calibration and generalizability of probabilistic models on low-data chemical datasets with DIONYSUS
Source: Royal Society of Chemistry journal article supplement (doi:10.1039/d2dd00146b), 2023-01-01

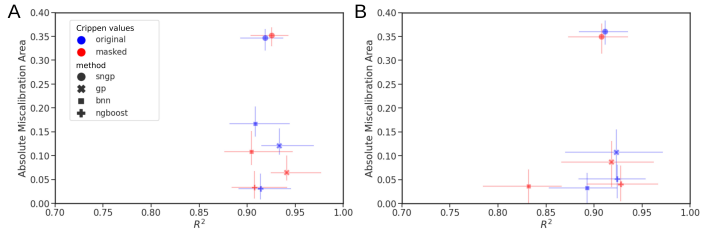

Supplement: d2dd00146b2.pdf [file d2dd00146b2.pdf]

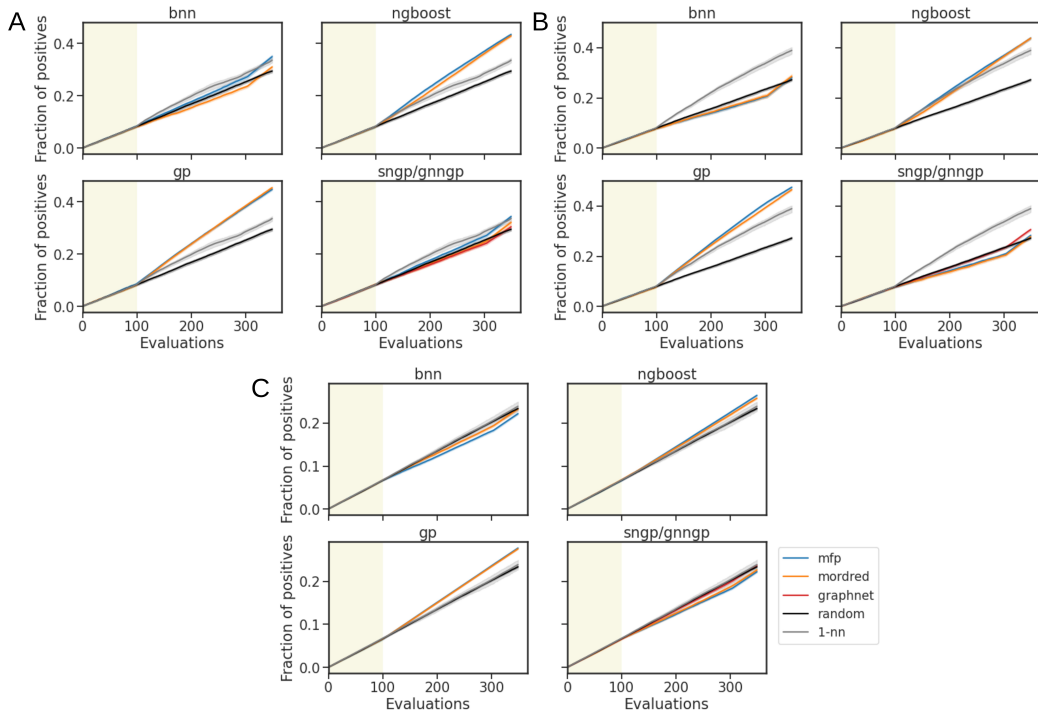

Supplement: d2dd00146b4.pdf [file d2dd00146b4.pdf]

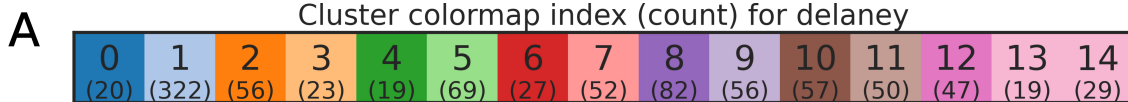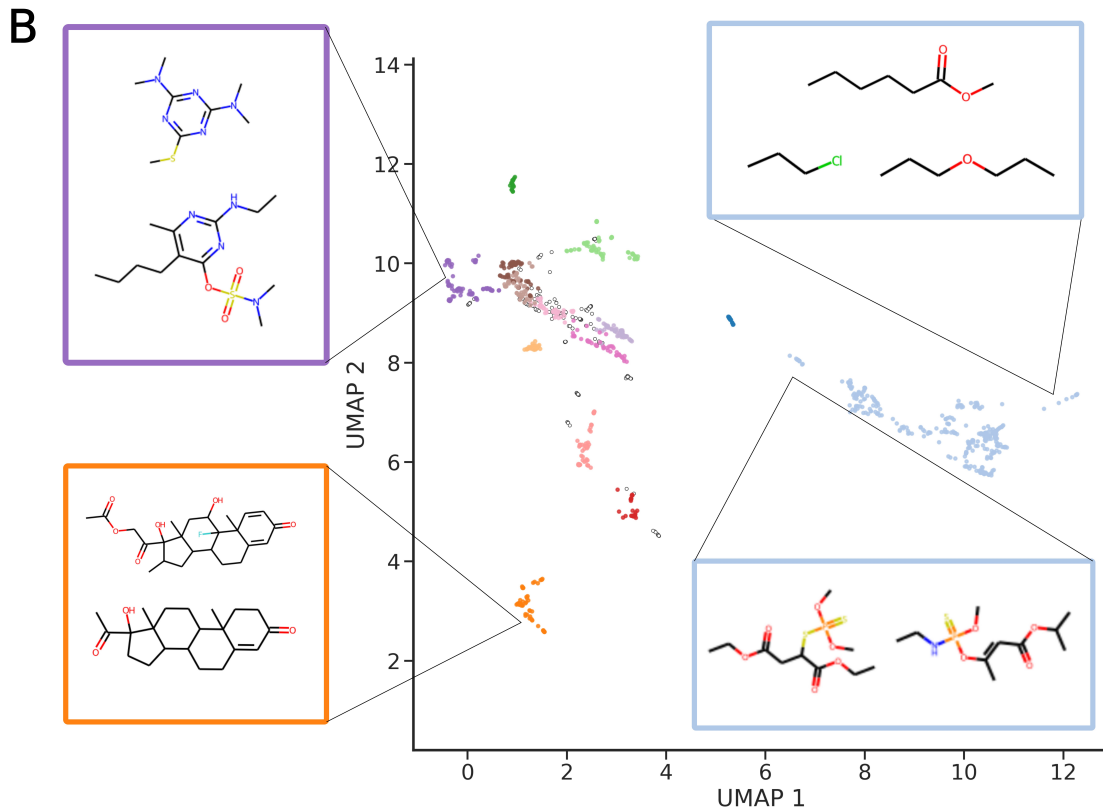

Supplement: d2dd00146b5.pdf [file d2dd00146b5.pdf]

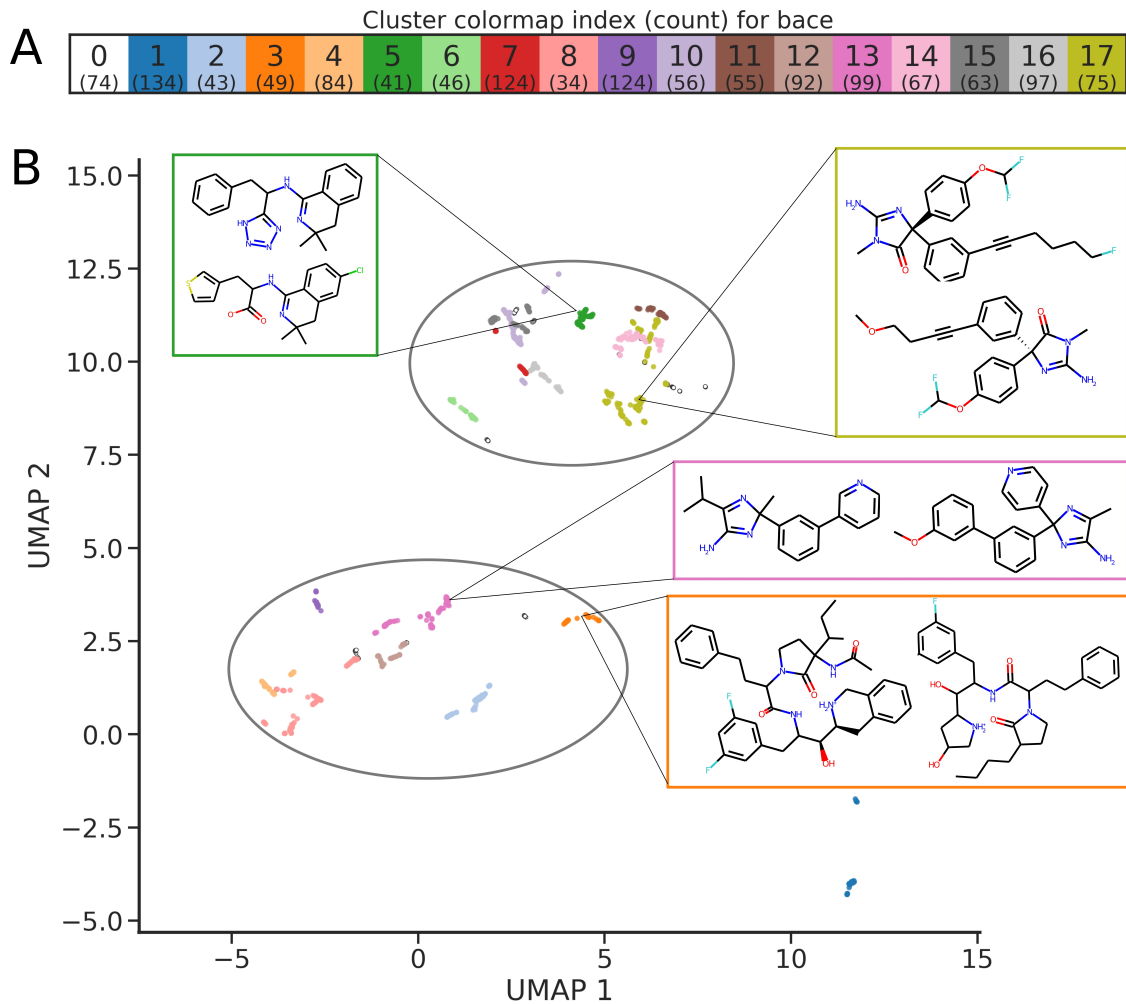

Supplement: d2dd00146b6.pdf [file d2dd00146b6.pdf]

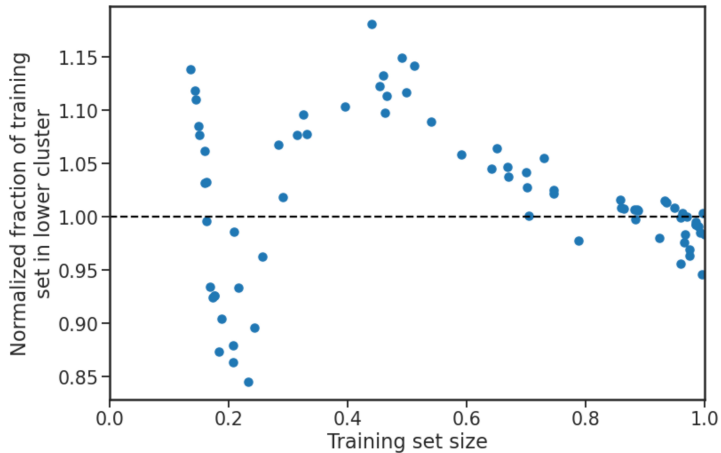

Supplement: d2dd00146b7.pdf [file d2dd00146b7.pdf]
